# Supplementary material for: Dynamic Analysis of Serum MMP-7 and Its Relationship with Disease Progression in Biliary Atresia: A Multicenter Prospective Study
Source: Research Square preprint supplement (doi:10.21203/rs.3.rs-866431/v1), 2021-09-27
Supplement: Supplementary file 1 [file 24dfce7da168e5c822d43a10.docx]

Supplementary Table 6. Detailed information of included patients in each center

| Hospital | Follow-up longer than two years | SNL | Non-SNL | SNL% | *p* |
| --- | --- | --- | --- | --- | --- |
| Wuhan Union Hospital | 62 | 38 | 24 | 61.29% | 0.820 |
| Xi’an children’s Hospital | 23 | 12 | 11 | 52.17% |  |
| Wuhan Children’s Hospital | 13 | 7 | 6 | 53.85% |  |
| Shenzhen Children’s Hospital | 10 | 5 | 5 | 50.00% |  |
| Hebei Children’s Hospital | - | - | - | - |  |
| Total | 108 | 62 | 46 | 57.41% |  |
