# Supplementary material for: Dynamic Analysis of Serum MMP-7 and Its Relationship with Disease Progression in Biliary Atresia: A Multicenter Prospective Study
Source: Research Square preprint supplement (doi:10.21203/rs.3.rs-866431/v1), 2021-09-27
Supplement: Supplementary file 2 [file 514e0ade2adf6c1ae8d8998a.docx]

Supplementary Table 12. Cox regression analysis for SNL in 2 years post-KPE

| Indicators | B | SE | Sig | EXP(B) (95%CI) |
| --- | --- | --- | --- | --- |
| MMP-7 | 1.67 | 0.39 | < 0.001 | 5.34 (2.50-11.39) |
| TBIL | 1.43 | 0.35 | < 0.001 | 8.24 (2.11-8.20) |
| APRI | 0.88 | 0.30 | 0.003 | 2.40 (1.34-4.32) |
