# Supplementary material for: Dynamic Analysis of Serum MMP-7 and Its Relationship with Disease Progression in Biliary Atresia: A Multicenter Prospective Study
Source: Research Square preprint supplement (doi:10.21203/rs.3.rs-866431/v1), 2021-09-27
Supplement: Supplementary file 3 [file ca1b6d29a4f3195df8dfc91d.docx]

Supplementary Table 1. The area under the curve of each indicator for SNL in two years

|  | AUC (95%CI) | indicators | AUC (95%CI) | *p*-value* |
| --- | --- | --- | --- | --- |
| MMP-7 (6 weeks) | 0.796 (0.707 - 0.867) | TBIL | 0.597 (0.499 - 0.691) | 0.0024 |
|  |  | DBIL | 0.587 (0.489 - 0.681) | 0.0015 |
|  |  | GGT | 0.579 (0.480 - 0.673) | 0.0002 |
|  |  | Fibro-touch | 0.588 (0.489 - 0.681) | 0.0019 |
|  |  | APRI | 0.510 (0.412 – 0.607) | < 0.0001 |
| MMP-7 (12 weeks) | 0.861 (0.781 - 0.920) | TBIL | 0.752 (0.659 - 0.830) | 0.0453 |
|  |  | DBIL | 0.745 (0.652 - 0.824) | 0.0304 |
|  |  | GGT | 0.765 (0.674 - 0.842) | 0.0477 |
|  |  | Fibro-touch | 0.741 (0.648 - 0.821) | 0.0087 |
|  |  | APRI | 0.722 (0.627 - 0.803) | 0.0152 |

*Delong test
